# Supplementary material for: Microarray Technology May Reveal the Contribution of Allergen Exposure and Rhinovirus Infections as Possible Triggers for Acute Wheezing Attacks in Preschool Children
Source: MDPI journal article supplement (doi:10.3390/v13050915), 2021-05-15
Supplement: s1 [file s1]

**Table S1. List of molecules spotted on the allergen chip.**

| Allergen                     | Source                   | Rec. or natural | Name/Function of the protein/Allergen family     |
|------------------------------|--------------------------|-----------------|--------------------------------------------------|
| <b>Respiratory allergens</b> |                          |                 |                                                  |
| Aln g 1                      | <i>Alder</i>             | R               | PR-10                                            |
| Alt a 1                      | <i>Alternaria</i>        | R               | Acidic glycoprotein                              |
| Alt a 6                      | <i>Alternaria</i>        | R               | Enolase                                          |
| Amb a 1                      | <i>Ragweed</i>           | N               | Pectate lyase                                    |
| Art v 1                      | <i>Mugwort</i>           | N               | Defensin                                         |
| Art v 3                      | <i>Mugwort</i>           | N               | LTP                                              |
| Asp f 1                      | <i>Aspergillus</i>       | R               | Mitogillin family                                |
| Asp f 3                      | <i>Aspergillus</i>       | R               | Peroxisomal protein                              |
| Asp f 6                      | <i>Aspergillus</i>       | R               | Mn superoxide dismutase                          |
| Bet v 1                      | <i>Birch</i>             | R               | PR-10                                            |
| Bet v 2                      | <i>Birch</i>             | R               | Profilin                                         |
| Bet v 4                      | <i>Birch</i>             | R               | Polcalcin                                        |
| Bla g 1                      | <i>Cockroach</i>         | R               | Cockroach group 1                                |
| Bla g 2                      | <i>Cockroach</i>         | R               | Aspartic protease                                |
| Bla g 5                      | <i>Cockroach</i>         | R               | Glutathione S-transferase                        |
| Bla g 7                      | <i>Cockroach</i>         | N               | Tropomyosin                                      |
| Blo t 5                      | <i>Blomia tropicalis</i> | R               | Group 5/21 mite allergens                        |
| Can f 1                      | <i>Dog</i>               | R               | Lipocalin                                        |
| Can f 2                      | <i>Dog</i>               | R               | Lipocalin                                        |
| Can f 3                      | <i>Dog</i>               | N               | Serum Albumin                                    |
| Can f 4                      | <i>Dog</i>               | R               | Lipocalin (Odorant-binding protein)              |
| Can f 5                      | <i>Dog</i>               | R               | Arginine esterase (Trypsin-like serine protease) |
| Can f 6                      | <i>Dog</i>               | R               | Lipocalin                                        |
| Che a 1                      | <i>Goosefoot</i>         | R               | Trypsin Inhibitor                                |
| Cyn d 1                      | <i>Bermuda grass</i>     | N               | Grass group 1                                    |
| Cry j 1                      | <i>Japanese cedar</i>    | N               | Pectate lyase                                    |
| Cup a 1                      | <i>Cypress</i>           | N               | Pectate lyase                                    |
| Der f 1                      | <i>House dust mite</i>   | N               | Cysteine protease                                |
| Der f 2                      | <i>House dust mite</i>   | R               | NPC2 family                                      |
| Der p 1                      | <i>House dust mite</i>   | N               | Cysteine protease                                |
| Der p 2                      | <i>House dust mite</i>   | R               | NPC2 family                                      |
| Der p 4                      | <i>House dust mite</i>   | R               | Alpha amylase                                    |
| Der p 5                      | <i>House dust mite</i>   | R               | Group 5 mite allergens                           |
| Der p 7                      | <i>House dust mite</i>   | R               | Group 7 mite allergens                           |

|                              |                        |   |                                           |
|------------------------------|------------------------|---|-------------------------------------------|
| Der p 10                     | <i>House dust mite</i> | R | Tropomyosin                               |
| Der p 11                     | <i>House dust mite</i> | R | Paramyosin                                |
| Der p 14                     | <i>House dust mite</i> | R | Apolipoporphin                            |
| Der p 15                     | <i>House dust mite</i> | R | Chitinase-like protein                    |
| Der p 18                     | <i>House dust mite</i> | R | Chitin-binding protein                    |
| Der p 21                     | <i>House dust mite</i> | R | Group 21 mite allergens                   |
| Der p 23                     | <i>House dust mite</i> | R | Peritrophin-like protein                  |
| Der p 37                     | <i>House dust mite</i> | R | Protein similar to chitin-binding protein |
| Equ c 1                      | <i>Horse</i>           | R | Lipocalin                                 |
| Equ c 3                      | <i>Horse</i>           | N | Serum Albumin                             |
| Fag e 2                      | <i>Buckwheat</i>       | N | Storage protein, 2S albumin               |
| Fel d 1                      | <i>Cat</i>             | R | Uteroglobin                               |
| Fel d 2                      | <i>Cat</i>             | N | Serum Albumin                             |
| Fel d 4                      | <i>Cat</i>             | R | Lipocalin                                 |
| Lep d 2                      | <i>Storage mite</i>    | R | NPC2 family                               |
| Mal d 1                      | <i>Apple</i>           | R | PR-10                                     |
| Mer a 1                      | <i>Annual mercury</i>  | R | Profilin                                  |
| Mus m 1                      | <i>Mouse</i>           | N | Lipocalin                                 |
| MUXF3                        | <i>CCD</i>             | N | CCD                                       |
| Phl p 1                      | <i>Timothy</i>         | R | Grass group 1                             |
| Phl p 2                      | <i>Timothy</i>         | R | Grass group 2                             |
| Phl p 4                      | <i>Timothy</i>         | N | Berberine bridge enzyme                   |
| Phl p 5                      | <i>Timothy</i>         | R | Grass group 5                             |
| Phl p 6                      | <i>Timothy</i>         | R | Grass group 6                             |
| Phl p 7                      | <i>Timothy</i>         | R | Polcalcin                                 |
| Phl p 11                     | <i>Timothy</i>         | R | Trypsin inhibitor                         |
| Phl p 12                     | <i>Timothy</i>         | R | Profilin                                  |
| Pla a 1                      | <i>Plane</i>           | R | Invertase Inhibitor                       |
| Pla a 2                      | <i>Plane</i>           | N | Polygalacturonase                         |
| Pla a 3                      | <i>Plane</i>           | R | LTP                                       |
| Pla l 1                      | <i>Plantain</i>        | R | Pectate lyase                             |
| <b><i>Food allergens</i></b> |                        |   |                                           |
| Act d 1                      | <i>Kiwi</i>            | N | Cysteine protease                         |
| Act d 2                      | <i>Kiwi</i>            | N | Thaumatococcus-like protein               |
| Act d 5                      | <i>Kiwi</i>            | N | Kiwelin                                   |
| Act d 8                      | <i>Kiwi</i>            | R | PR-10                                     |
| Ana o 1                      | <i>Cashew nut</i>      | N | Vicilin-like protein                      |
| Ana o 2                      | <i>Cashew nut</i>      | R | Storage protein, 11S globulin             |
| nAna o 2                     | <i>Cashew nut</i>      | N | Storage protein, 11S globulin             |

|                      |                         |   |                                             |
|----------------------|-------------------------|---|---------------------------------------------|
| Ana o 3              | <i>Cashew nut</i>       | R | Storage protein, 2S albumin                 |
| Api g 1              | <i>Celery</i>           | R | PR-10                                       |
| Ara h 1              | <i>Peanut</i>           | R | Storage protein, 7S globulin                |
| Ara h 2              | <i>Peanut</i>           | R | Storage protein, 2S albumin                 |
| Ara h 3              | <i>Peanut</i>           | R | Storage protein, 11S albumin                |
| Ara h 6              | <i>Peanut</i>           | N | Storage protein, 2S albumin                 |
| Ara h 8              | <i>Peanut</i>           | R | PR-10                                       |
| Ara h 9              | <i>Peanut</i>           | R | LTP                                         |
| Ber e 1              | <i>Brazil nut</i>       | R | Storage protein, 2S albumin                 |
| Bos d 4              | <i>Cow's Milk</i>       | N | Alpha-lactalbumin                           |
| Bos d 5              | <i>Cow's Milk</i>       | N | Beta-lactoglobulin                          |
| Bos d Lactoferrin    | <i>Cow's Milk</i>       | N | Transferrin                                 |
| Bos d 8              | <i>Cow's Milk</i>       | N | Casein                                      |
| aS1-casein           | <i>Cow's Milk</i>       | N | Casein                                      |
| aS2-casein           | <i>Cow's Milk</i>       | N | Casein                                      |
| b-casein             | <i>Cow's Milk</i>       | N | Casein                                      |
| K-casein             | <i>Cow's Milk</i>       | N | Casein                                      |
| Transferrin          | <i>Cow's Milk</i>       | N | Transferrin                                 |
| Bovine serum albumin | <i>Cow's Milk</i>       | N | Serum albumin                               |
| Bos d 6              | <i>Cow</i>              | N | Serum albumin                               |
| Cor a 1.0401         | <i>Hazelnut</i>         | R | PR-10                                       |
| Cor a 8              | <i>Hazelnut</i>         | R | LTP                                         |
| Cor a 9              | <i>Hazelnut</i>         | N | Storage protein, 11S globulin               |
| Gad c 1              | <i>Codfish</i>          | R | Parvalbumin                                 |
| Gal d 1              | <i>Egg white</i>        | N | Ovomucoid                                   |
| Gal d 2              | <i>Egg white</i>        | N | Ovalbumin                                   |
| Gal d 3              | <i>Egg white</i>        | N | Ovotransferrin                              |
| Gal d 5              | <i>Egg yolk/chicken</i> | N | Livetin (serum albumin)                     |
| Gly m 4              | <i>Soy</i>              | R | PR-10                                       |
| Gly m 5              | <i>Soy</i>              | N | Storage protein, Beta-conglycinin           |
| Gly m 6              | <i>Soy</i>              | N | Storage protein, Glycinin                   |
| Jug r 1              | <i>Walnut</i>           | N | Storage protein, 2S albumin                 |
| Jug r 2              | <i>Walnut</i>           | N | Cupin superfamily, 7S Vicilin-like globulin |
| Jug r 3              | <i>Walnut</i>           | N | LTP                                         |
| Ole e 1              | <i>Olive</i>            | N | Trypsin inhibitor                           |
| Ole e 7              | <i>Olive</i>            | N | LTP                                         |
| Ole e 9              | <i>Olive</i>            | R | Glucanase                                   |
| rOle e 5             | <i>Olive</i>            | R | Superoxide dismutase                        |

|                                 |                       |             |                                     |
|---------------------------------|-----------------------|-------------|-------------------------------------|
| rOle e 6                        | <i>Olive</i>          | R           | Oleaceae group 6                    |
| rOle e 8                        | <i>Olive</i>          | R           | Calcium-binding protein (Polcalcin) |
| rOle e 10                       | <i>Olive</i>          | R           | Glycosyl hydrolase                  |
| Par j 2                         | <i>Wall pellitory</i> | R           | LTP                                 |
| Pen m 1                         | <i>Shrimp</i>         | N           | Tropomyosin                         |
| Pen m 2                         | <i>Shrimp</i>         | N           | Arginine Kinase                     |
| Pen m 4                         | <i>Shrimp</i>         | N           | Calcium-binding protein             |
| Pis v 3                         | <i>Pistachio</i>      | R           | 7S Vicilin-like Globulin            |
| Pru p 1                         | <i>Peach</i>          | R           | PR-10                               |
| Pru p 3                         | <i>Peach</i>          | R           | LTP                                 |
| Pru du 3                        | <i>Almond</i>         | R           | LTP                                 |
| Pru du 4                        | <i>Almond</i>         | R           | Profilin                            |
| Pru du 6                        | <i>Almond</i>         | N           | Storage protein, 11S globulin       |
| Pru du 6.01                     | <i>Almond</i>         | R           | Storage protein, 11S globulin       |
| Pru du 6.02                     | <i>Almond</i>         | R           | Storage protein, 11S globulin       |
| Sal k 1                         | <i>Saltwort</i>       | N           | Pectin methylesterase               |
| Ses i 1                         | <i>Sesame</i>         | N           | Storage protein, 2S albumin         |
| Tri a 14                        | <i>Wheat</i>          | R           | LTP                                 |
| Tri a 19.0101                   | <i>Wheat</i>          | N           | Omega 5 gliadin                     |
| Tri a aA_TI                     | <i>Wheat</i>          | N           | Alpha-Amylase / Trypsin Inhibitor   |
| Tri a 36 191                    | <i>Wheat</i>          | R           | Fragment of LMW Glutenin            |
| Tri a 36                        | <i>Wheat</i>          | R           | Glutenin Subunit, LMW Glutenin      |
| GG1                             | <i>Wheat</i>          | R           | Gamma gliadin 1                     |
| Peptide 4                       | <i>Wheat</i>          | R (peptide) | Peptide from gamma gliadin 1        |
| Clone 79                        | <i>Wheat</i>          | R           | Gamma gliadin                       |
| Clone 85                        | <i>Wheat</i>          | R           | Gamma gliadin                       |
| Clone 110                       | <i>Wheat</i>          | R           | Gamma gliadin (Fragment)            |
| Avenin                          | <i>Wheat</i>          | R           | Avenin                              |
| m43                             | <i>Wheat</i>          | R           | Fragment of HMW Glutenin Bx7        |
| m82                             | <i>Wheat</i>          | R           | Fragment of HMW Glutenin Bx7        |
| #10/Serine proteinase inhibitor | <i>Wheat</i>          | R           | Serine proteinase inhibitor         |
| #37/Thioredoxin                 | <i>Wheat</i>          | R           | Thionin                             |
| #38/Glutathione transferase     | <i>Wheat</i>          | R           | Glutathione transferase             |
| #112/1 Cys-peroxiredoxin        | <i>Wheat</i>          | R           | Peroxiredoxin (1-Cys-peroxiredoxin) |
| #123/Profilin                   | <i>Wheat</i>          | R           | Profilin                            |
| #126/Dehydrin                   | <i>Wheat</i>          | R           | Dehydrin                            |
| Alpha                           | <i>Wheat</i>          | R           | Alpha-purothionin                   |

|                               |                  |   |                               |
|-------------------------------|------------------|---|-------------------------------|
| purothionin                   |                  |   |                               |
| LTP                           | <i>Wheat</i>     | R | LTP                           |
| <b><i>Other allergens</i></b> |                  |   |                               |
| Ani s 1                       | <i>Anisakis</i>  | R | Serine protease inhibitor     |
| Ani s 3                       | <i>Anisakis</i>  | R | Tropomyosin                   |
| Api m 1                       | <i>Bee venom</i> | R | Phospholipase A2              |
| Api m 2                       | <i>Bee venom</i> | R | Hyaluronidase                 |
| Api m 4                       | <i>Bee venom</i> | R | Melittin                      |
| Hev b 1                       | <i>Latex</i>     | R | Rubber elongation factor      |
| Hev b 3                       | <i>Latex</i>     | R | Small rubber particle protein |
| Hev b 5                       | <i>Latex</i>     | R | Acidic protein                |
| Hev b 6.01                    | <i>Latex</i>     | R | Hevein                        |
| Hev b 8                       | <i>Latex</i>     | R | Profilin                      |
| Ves v 1                       | <i>Wasp</i>      | R | Phospholipase                 |
| Ves v 5                       | <i>Wasp</i>      | R | Antigen 5                     |
| htTG                          | <i>Human</i>     | R | Human tissue transglutamine   |
